# Supplementary material
Source: PubMed Central journal article supplement (PMC3134605)
Supplement: NIHMS285496-supplement-01.pdf [file NIHMS285496-supplement-01.pdf]

### Supplemental Information

**Table S1.** Demographic comparisons of the complete NIH Objective 1 cohort ( $n = 431$ ) and cortical thickness analysis sample ( $n = 193$ )

|                               | <b><math>n = 431</math></b>                                                                    | <b><math>n = 193</math></b>                                                                                                      |
|-------------------------------|------------------------------------------------------------------------------------------------|----------------------------------------------------------------------------------------------------------------------------------|
| Age in Years*                 | 10.4 $\pm$ 0.20 (4.6-18.3)                                                                     | <b>11.8 <math>\pm</math> 0.25 (6-18)</b><br><b><math>p &lt; 0.001</math></b>                                                     |
| Gender Proportions**          | Females = 52.0%<br>Males = 48.0%                                                               | Females = 54.4%<br>Males = 45.6%<br>$\chi^2 = 0.446$<br>$p > 0.50$                                                               |
| Race**                        | White = 81.7%<br>African American = 9.5%<br>Other or N/A = 8.8%                                | White = 83.4%<br>African American = 8.8%<br>Other or N/A = 7.8%<br>$\chi^2 = 0.396$<br>$p > 0.95$                                |
| Household Income in 1,000\$** | Less than 35 = 8.8%<br>35 to 50 = 19.0%<br>50-75 = 24.1%<br>75-100 = 23.7%<br>Over 100 = 24.4% | Less than 35 = 6.2%<br>35 to 50 = 18.1%<br>50-75 = 22.2%<br>75-100 = 25.9%<br>Over 100 = 27.5%<br>$\chi^2 = 2.941$<br>$p > 0.50$ |
| Hand Used to Write            | Right = 88.9%<br>Left = 10.4%<br>N/A = 0.7%                                                    | Right = 90.2%<br>Left = 9.8%<br>$\chi^2 = 1.441$<br>$p > 0.30$                                                                   |
| CBCL AGG Average Score*       | 2.86 $\pm$ 0.15 (range 0-21***)                                                                | <b>2.47 <math>\pm</math> 0.19 (0-11)</b><br><b><math>p = 0.047</math></b>                                                        |

\*One sample  $t$  test with the standard error comparing the utilized sample ( $n = 193$ ) to the average of the complete NIH cohort, which is deemed to be representative of the population.

\*\* $\chi^2$  for goodness of fit using the full NIH cohort proportions as the predicted model.

\*\*\*Only one subject had a very high score, with most CBCL Aggressive Behavior raw scores between 0-12.

Values in bold are statistically significant.

**Table S2.** Demographic comparisons of males ( $n = 88$ ) versus females ( $n = 105$ ) subjects

|                               | <b>Males<br/><math>n = 88</math></b>                                                           | <b>Females<br/><math>n = 105</math></b>                                                                                          |
|-------------------------------|------------------------------------------------------------------------------------------------|----------------------------------------------------------------------------------------------------------------------------------|
| Age in Years*                 | 11.7 $\pm$ 0.35 (6-18)                                                                         | 11.9 $\pm$ 0.34 (6-18)<br>$p = 0.768$                                                                                            |
| Race**                        | White = 82.9%<br>African American = 9.5%<br>Other or N/A = 7.6%                                | White = 84.0%<br>African American = 8.0%<br>Other or N/A = 8.0%<br>$\chi^2 = 0.150$<br>$p = 0.928$                               |
| Household Income in 1,000\$** | Less than 35 = 3.4%<br>35 to 50 = 23.9%<br>50-75 = 26.1%<br>75-100 = 23.9%<br>Over 100 = 22.7% | Less than 35 = 8.6%<br>35 to 50 = 13.3%<br>50-75 = 19.0%<br>75-100 = 27.6%<br>Over 100 = 31.4%<br>$\chi^2 = 7.64$<br>$p = 0.105$ |
| Hand Used to Write            | Right = 87.5%<br>Left = 12.5%                                                                  | Right = 92.4%<br>Left = 7.6%<br>$\chi^2 = 1.285$<br>$p = 0.257$                                                                  |
| CBCL AGG Average Score*       | 2.76 $\pm$ 0.32 (range 0-11)                                                                   | 2.23 $\pm$ 0.24 (range 0-10)<br>$p = 0.058$                                                                                      |

\*  $t$  test for independent samples with the standard error comparing males versus females average age and CBCL Aggressive Behavior raw scores.

\*\* $\chi^2$  for independent samples comparing males versus females proportion of race, income and handedness.

**Table S3.** Comparisons of the six scanner sites for CBCL Aggressive Behavior raw scores, age, gender distribution and volumetric measurements

|                                               | <b>Scanner 1</b>         | <b>Scanner 2</b>         | <b>Scanner 3</b>         | <b>Scanner 4</b>         | <b>Scanner 5</b>         | <b>Scanner 6</b>       |
|-----------------------------------------------|--------------------------|--------------------------|--------------------------|--------------------------|--------------------------|------------------------|
| Subjects                                      | 43                       | 40                       | 42                       | 27                       | 33                       | 8                      |
| Gender                                        | Male = 20<br>Female = 23 | Male = 20<br>Female = 20 | Male = 20<br>Female = 22 | Male = 15<br>Female = 12 | Male = 11<br>Female = 22 | Male = 2<br>Female = 6 |
| Mean AGG Score                                | 2.58 ± 0.4               | 2.28 ± 0.4               | 2.48 ± 0.4               | 3.19 ± 0.6               | 2.03 ± 0.37              | 2.25 ± 1.1             |
| Mean Age                                      | 11.0 ± 0.5               | 12.2 ± 0.6               | 11.6 ± 0.5               | 11.9 ± 0.75              | 12.6 ± 0.6               | 11.0 ± 1.3             |
| Mean Cortical Thickness (mm)                  | 3.59 ± 0.02              | 3.61 ± 0.03              | 3.58 ± 0.03              | 3.56 ± 0.03              | 3.54 ± 0.03              | 3.53 ± 0.06            |
| Mean Left Striatum (mm <sup>3</sup> )         | <b>10606 ± 154*</b>      | <b>11154 ± 182*</b>      | 10928 ± 157              | 10871 ± 161              | 11079 ± 187              | 11073 ± 337            |
| Mean Right Striatum (mm <sup>3</sup> )        | 10699 ± 151              | 11074 ± 187              | 10971 ± 171              | 11096 ± 169              | 11081 ± 180              | 11016 ± 344            |
| Mean Left Caudate (mm <sup>3</sup> )          | <b>5467 ± 81*</b>        | 5698 ± 98                | 5611 ± 88                | 5572 ± 94                | <b>5745 ± 100*</b>       | 5678 ± 154             |
| Mean Right Caudate (mm <sup>3</sup> )         | 5469 ± 82                | 5623 ± 102               | 5582 ± 91                | 5587 ± 97                | 5648 ± 103               | 5576 ± 140             |
| Mean Left Putamen (mm <sup>3</sup> )          | <b>5138 ± 90*</b>        | <b>5456 ± 98*</b>        | 5318 ± 91                | 5299 ± 103               | 5334 ± 109               | 5395 ± 198             |
| Mean Right Putamen (mm <sup>3</sup> )         | <b>5231 ± 86*</b>        | 5452 ± 100               | 5390 ± 101               | <b>5510 ± 109*</b>       | 5534 ± 101               | 5441 ± 217             |
| Mean Left Globus Pallidus (mm <sup>3</sup> )  | 1271 ± 26                | 1318 ± 23                | 1275 ± 22                | 1278 ± 31                | 1266 ± 31                | 1294 ± 68              |
| Mean Right Globus Pallidus (mm <sup>3</sup> ) | 1213 ± 31                | <b>1287 ± 23**</b>       | 1207 ± 28                | <b>1204 ± 30*</b>        | <b>1162 ± 29**</b>       | 1252 ± 62              |

Data in bold have significant between sites differences.

\* $p \leq 0.05$

\*\* $p \leq 0.01$

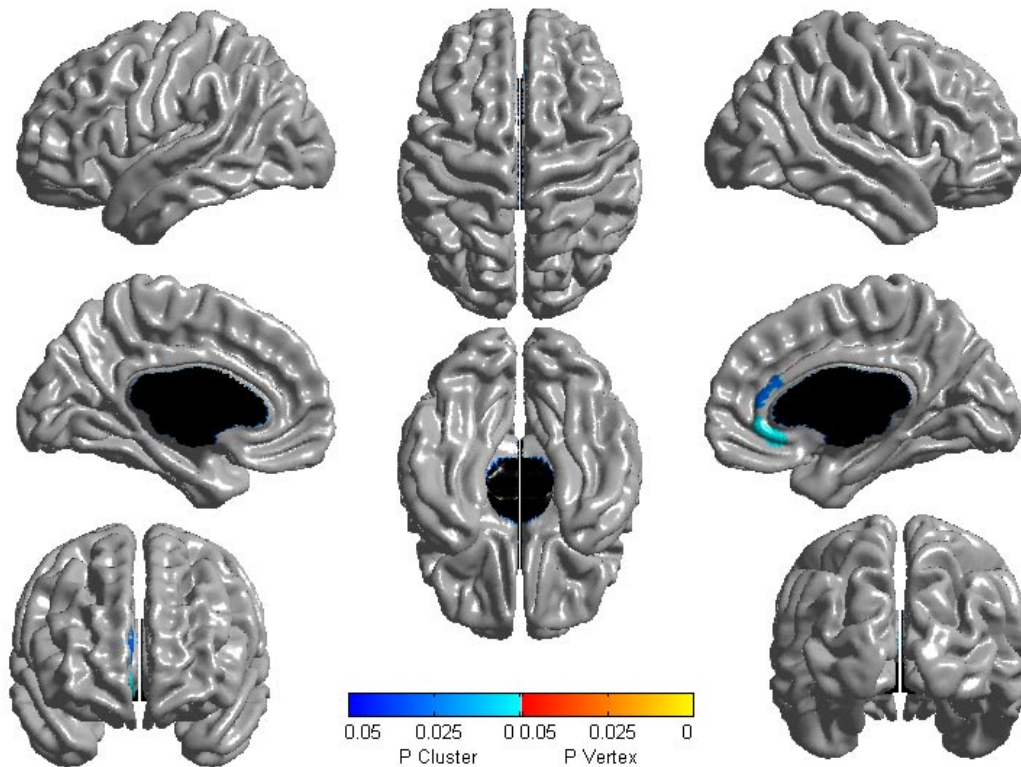

**Figure S1.** Brain areas where local cortical thickness is negatively associated with CBCL Aggressive Behavior raw scores in a first-order linear model in subjects with AGG scores  $\geq 3$  ( $n = 72$ ). Random field theory was used to correct for multiple comparisons over the whole cortical mantle. Figure is shown at  $p \leq 0.05$ , random field theory corrected. Blue areas are significant at the cluster level and red color corresponds to areas significant at the vertex level (none in this figure). Controlled for age, gender, scanner and total brain volume.

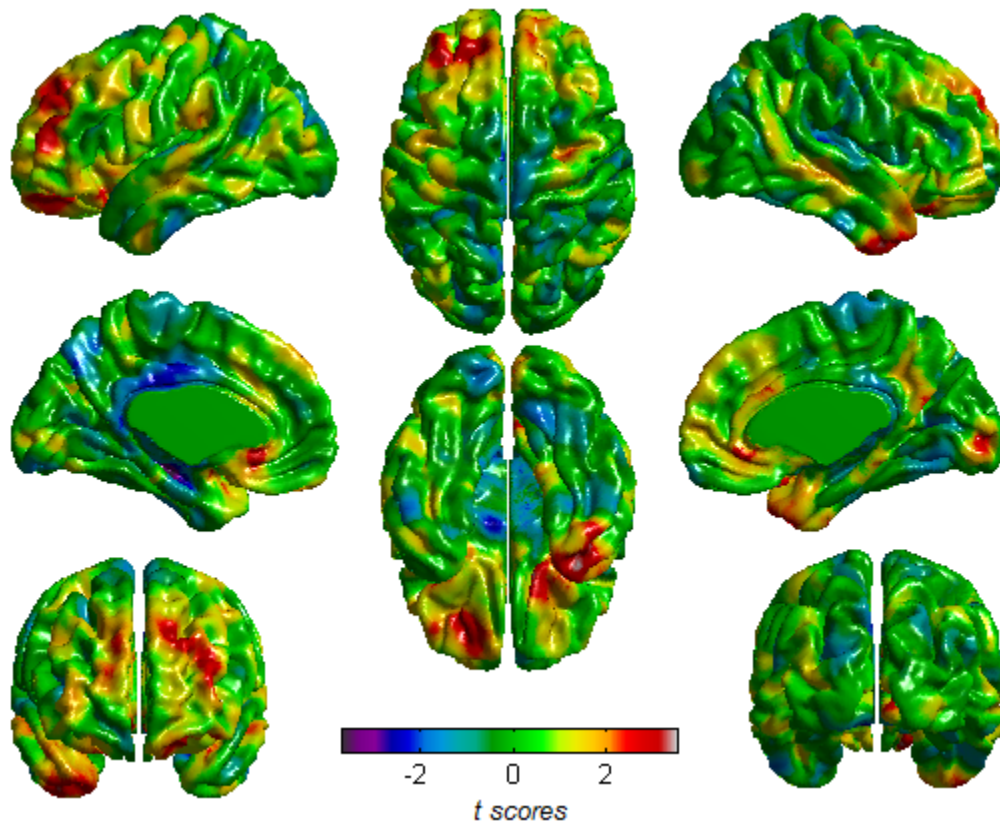

**Figure S2.** *t* scores map of the ‘gender by CBCL AGG’ interaction (females - males contrast,  $df = 182$ ) against local cortical thickness over the whole sample ( $n = 193$ ). A first-order linear model was used. Controlled for age, gender, scanner and total brain volume.

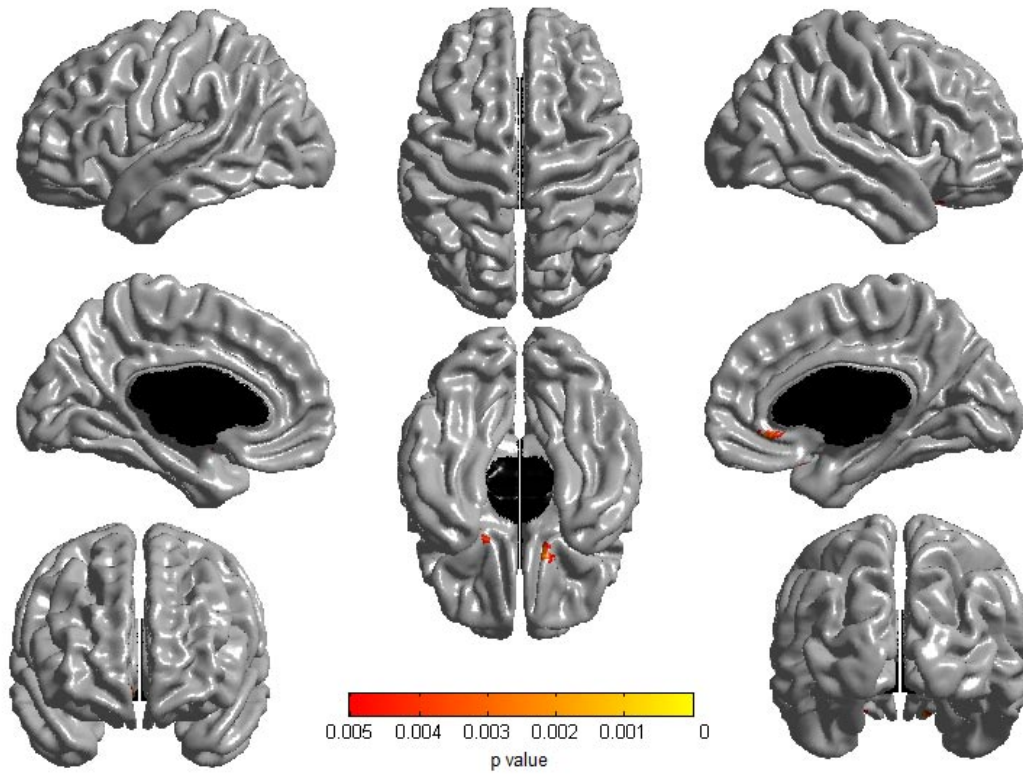

**Figure S3.** Brain areas where local cortical thickness is negatively associated with CBCL Aggressive Behavior raw scores in a first-order linear model in male subjects only ( $n = 88$ ). Threshold for trends was set at  $p = 0.005$  uncorrected for regions of interest (ACC/OFC). Figure is shown at  $p \leq 0.005$ , uncorrected. Controlled for age, scanner and total brain volume.

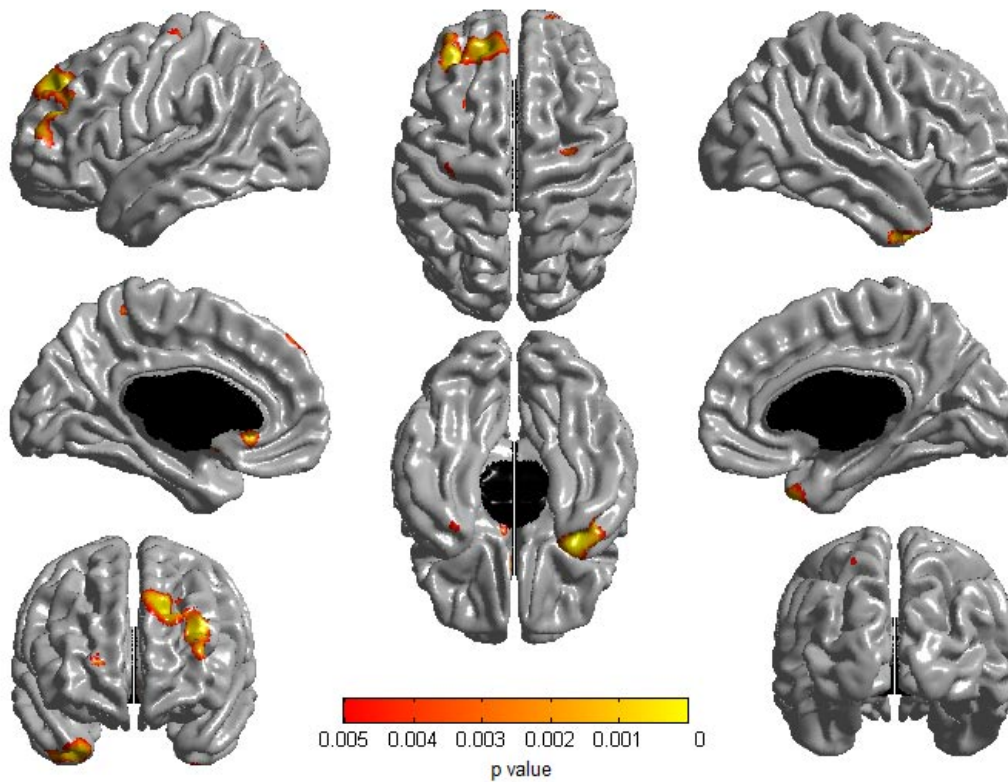

**Figure S4.** Brain areas where local cortical thickness is positively associated with CBCL Aggressive Behavior raw scores in a first-order linear model in female subjects only ( $n = 105$ ). Threshold for trends was set at  $p = 0.005$  uncorrected for regions of interest (ACC/OFC). Figure is shown at  $p \leq 0.005$ , uncorrected. Associations outside of the regions of interest were not significant after a random field theory correction. Controlled for age, scanner and total brain volume.
